# Supplementary material for: Is expert opinion reliable when estimating transition probabilities? The case of HCV-related cirrhosis in Egypt
Source: BMC Med Res Methodol. 2014 Mar 17;14:39. doi: 10.1186/1471-2288-14-39 (PMC4003824; doi:10.1186/1471-2288-14-39)
Supplement: Additional file 2 — Questionnaire. [file 1471-2288-14-39-S2.pdf]

APPENDIX: QUESTIONNAIRE

COMPENSATED CIRRHOSIS

| Gender | Age of the patient (years) | Disease stage of the patient | Time already spent in this stage (years) | Put a mark in the next column to show the probability that next year the patient will be/have ... |        |
|--------|----------------------------|------------------------------|------------------------------------------|---------------------------------------------------------------------------------------------------|--------|
|        |                            |                              |                                          |                                                                                                   | 0%100% |
| Man    | 20                         | Compensated cirrhosis        |                                          | dead, related to liver disease                                                                    |        |
| Man    | 40                         | Compensated cirrhosis        |                                          | dead, related to liver disease                                                                    |        |
| Man    | 60                         | Compensated cirrhosis        |                                          | dead, related to liver disease                                                                    |        |
|        |                            |                              |                                          |                                                                                                   | 0%100% |
| Man    | 20                         | Compensated cirrhosis        | 1-10                                     | HCC                                                                                               |        |
| Man    | 40                         | Compensated cirrhosis        | 1-10                                     | HCC                                                                                               |        |
| Man    | 60                         | Compensated cirrhosis        | 1-10                                     | HCC                                                                                               |        |
| Man    | 20                         | Compensated cirrhosis        | >10                                      | HCC                                                                                               |        |
| Man    | 40                         | Compensated cirrhosis        | >10                                      | HCC                                                                                               |        |
| Man    | 60                         | Compensated cirrhosis        | >10                                      | HCC                                                                                               |        |

FIRST DECOMPENSATION\*

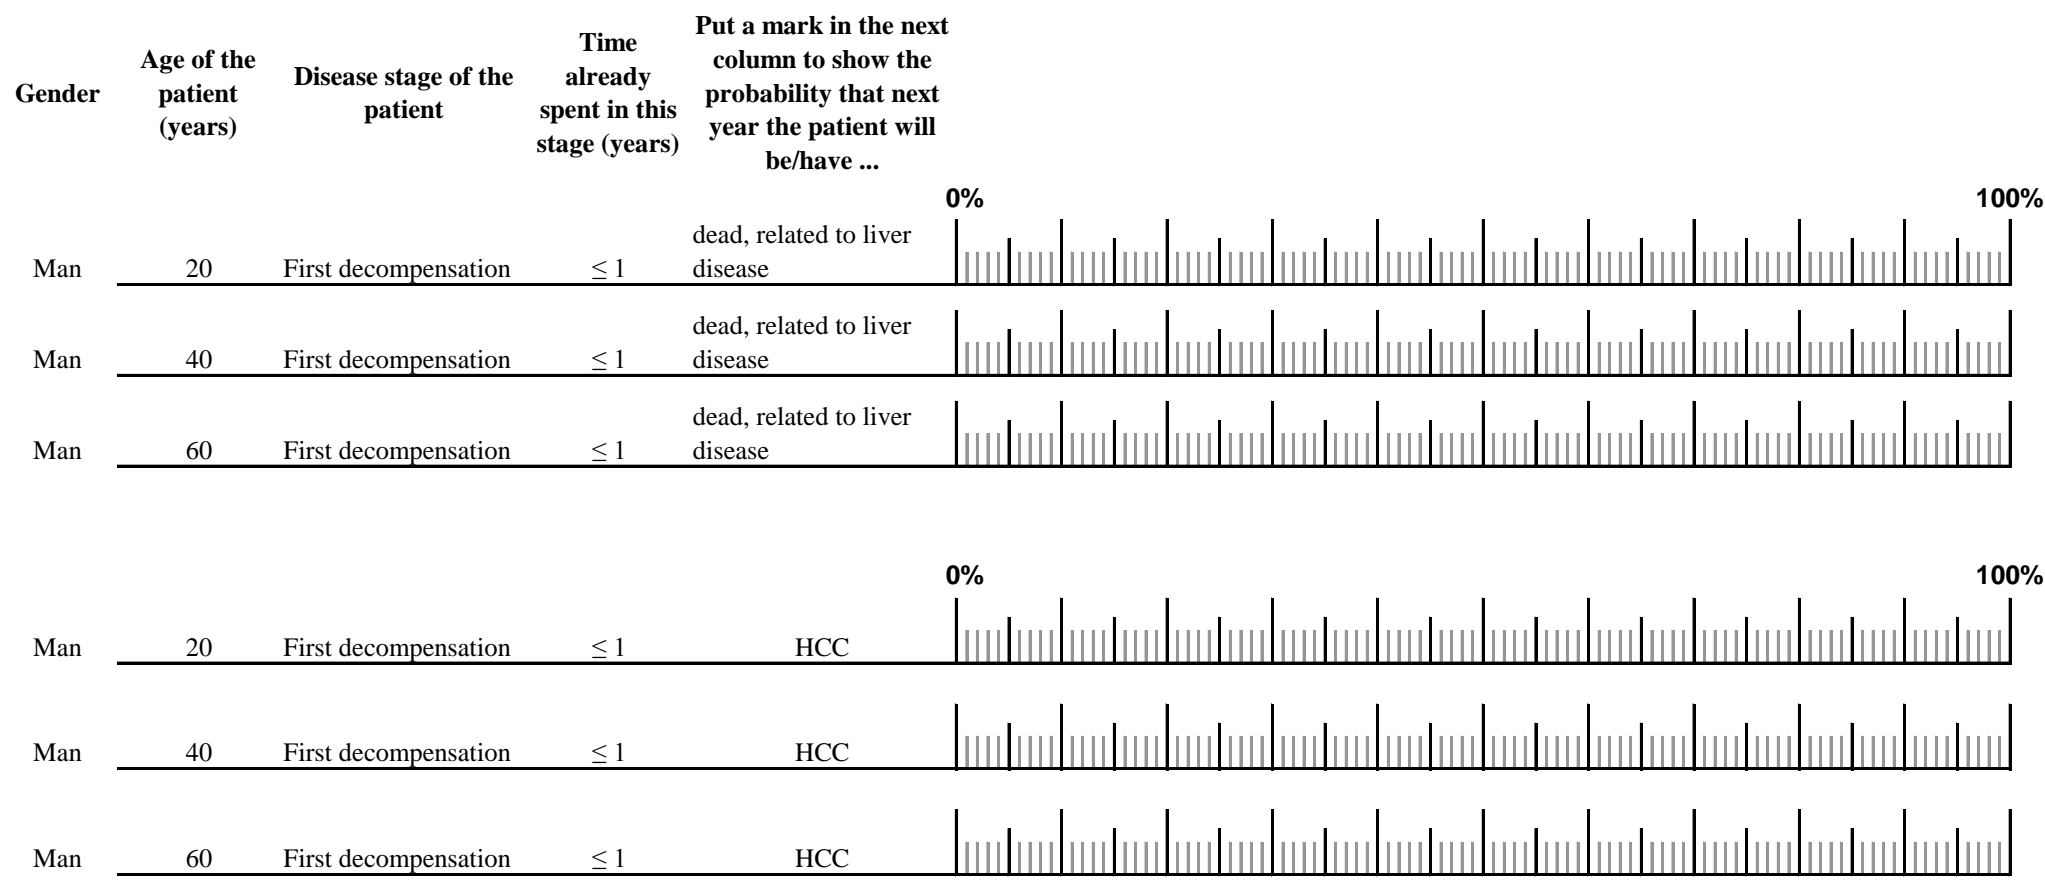

\* First decompensation: means the first decompensation episode (ascites, digestive hemorrhage, encephalopathy, icterus)

**STABLE DECOMPENSATED STATE\***

| Gender | Age of the patient (years) | Disease stage of the patient | Time already spent in this stage (years) | Put a mark in the next column to show the probability that next year the patient will be/have ... |                                                    |
|--------|----------------------------|------------------------------|------------------------------------------|---------------------------------------------------------------------------------------------------|----------------------------------------------------|
| Man    | 20                         | Stable decompensated state   |                                          | dead, related to liver disease                                                                    | <div><div>0%</div><div></div><div>100%</div></div> |
| Man    | 40                         | Stable decompensated state   |                                          | dead, related to liver disease                                                                    | <div><div></div><div></div><div></div></div>       |
| Man    | 60                         | Stable decompensated state   |                                          | dead, related to liver disease                                                                    | <div><div></div><div></div><div></div></div>       |
| Man    | 20                         | Stable decompensated state   | 1-10                                     | HCC                                                                                               | <div><div>0%</div><div></div><div>100%</div></div> |
| Man    | 40                         | Stable decompensated state   | 1-10                                     | HCC                                                                                               | <div><div></div><div></div><div></div></div>       |
| Man    | 60                         | Stable decompensated state   | 1-10                                     | HCC                                                                                               | <div><div></div><div></div><div></div></div>       |
| Man    | 40                         | Stable decompensated state   | >10                                      | HCC                                                                                               | <div><div></div><div></div><div></div></div>       |
| Man    | 60                         | Stable decompensated state   | >10                                      | HCC                                                                                               | <div><div></div><div></div><div></div></div>       |

\* Stable decompensated state: means the patient has a history of first decompensation, but afterwards no further decompensation episode

**PROGRESSIVE DECOMPENSATED STATE\***

| Gender | Age of the patient (years) | Disease stage of the patient    | Time already spent in this stage (years) | Put a mark in the next column to show the probability that next year the patient will be/have ... | 0% | 100% |
|--------|----------------------------|---------------------------------|------------------------------------------|---------------------------------------------------------------------------------------------------|----|------|
| Man    | 20                         | Progressive decompensated state |                                          | dead, related to liver disease                                                                    |    |      |
| Man    | 40                         | Progressive decompensated state |                                          | dead, related to liver disease                                                                    |    |      |
| Man    | 60                         | Progressive decompensated state |                                          | dead, related to liver disease                                                                    |    |      |
| Man    | 20                         | Progressive decompensated state |                                          | HCC                                                                                               |    |      |
| Man    | 40                         | Progressive decompensated state |                                          | HCC                                                                                               |    |      |
| Man    | 60                         | Progressive decompensated state |                                          | HCC                                                                                               |    |      |

\* Progressive decompensated state: means the patient has successive decompensation episodes

HCC\*

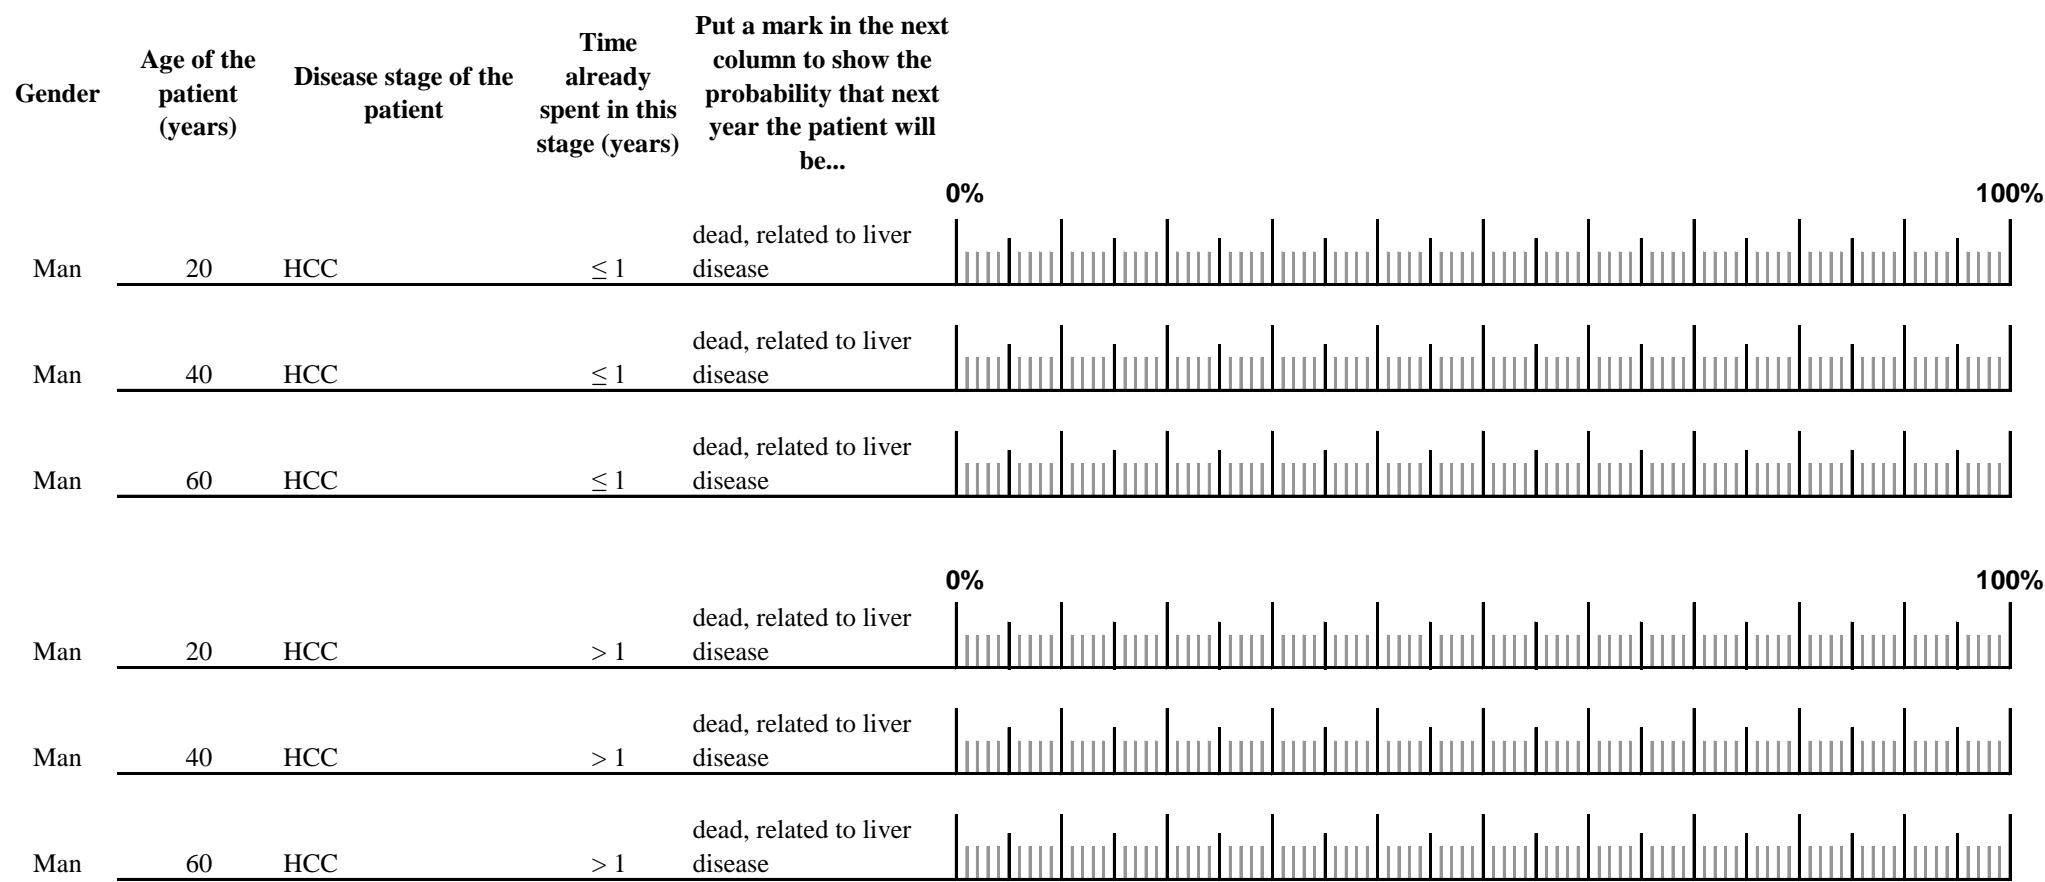

\* HCC: hepatocellular carcinoma

COMPENSATED CIRRHOSIS

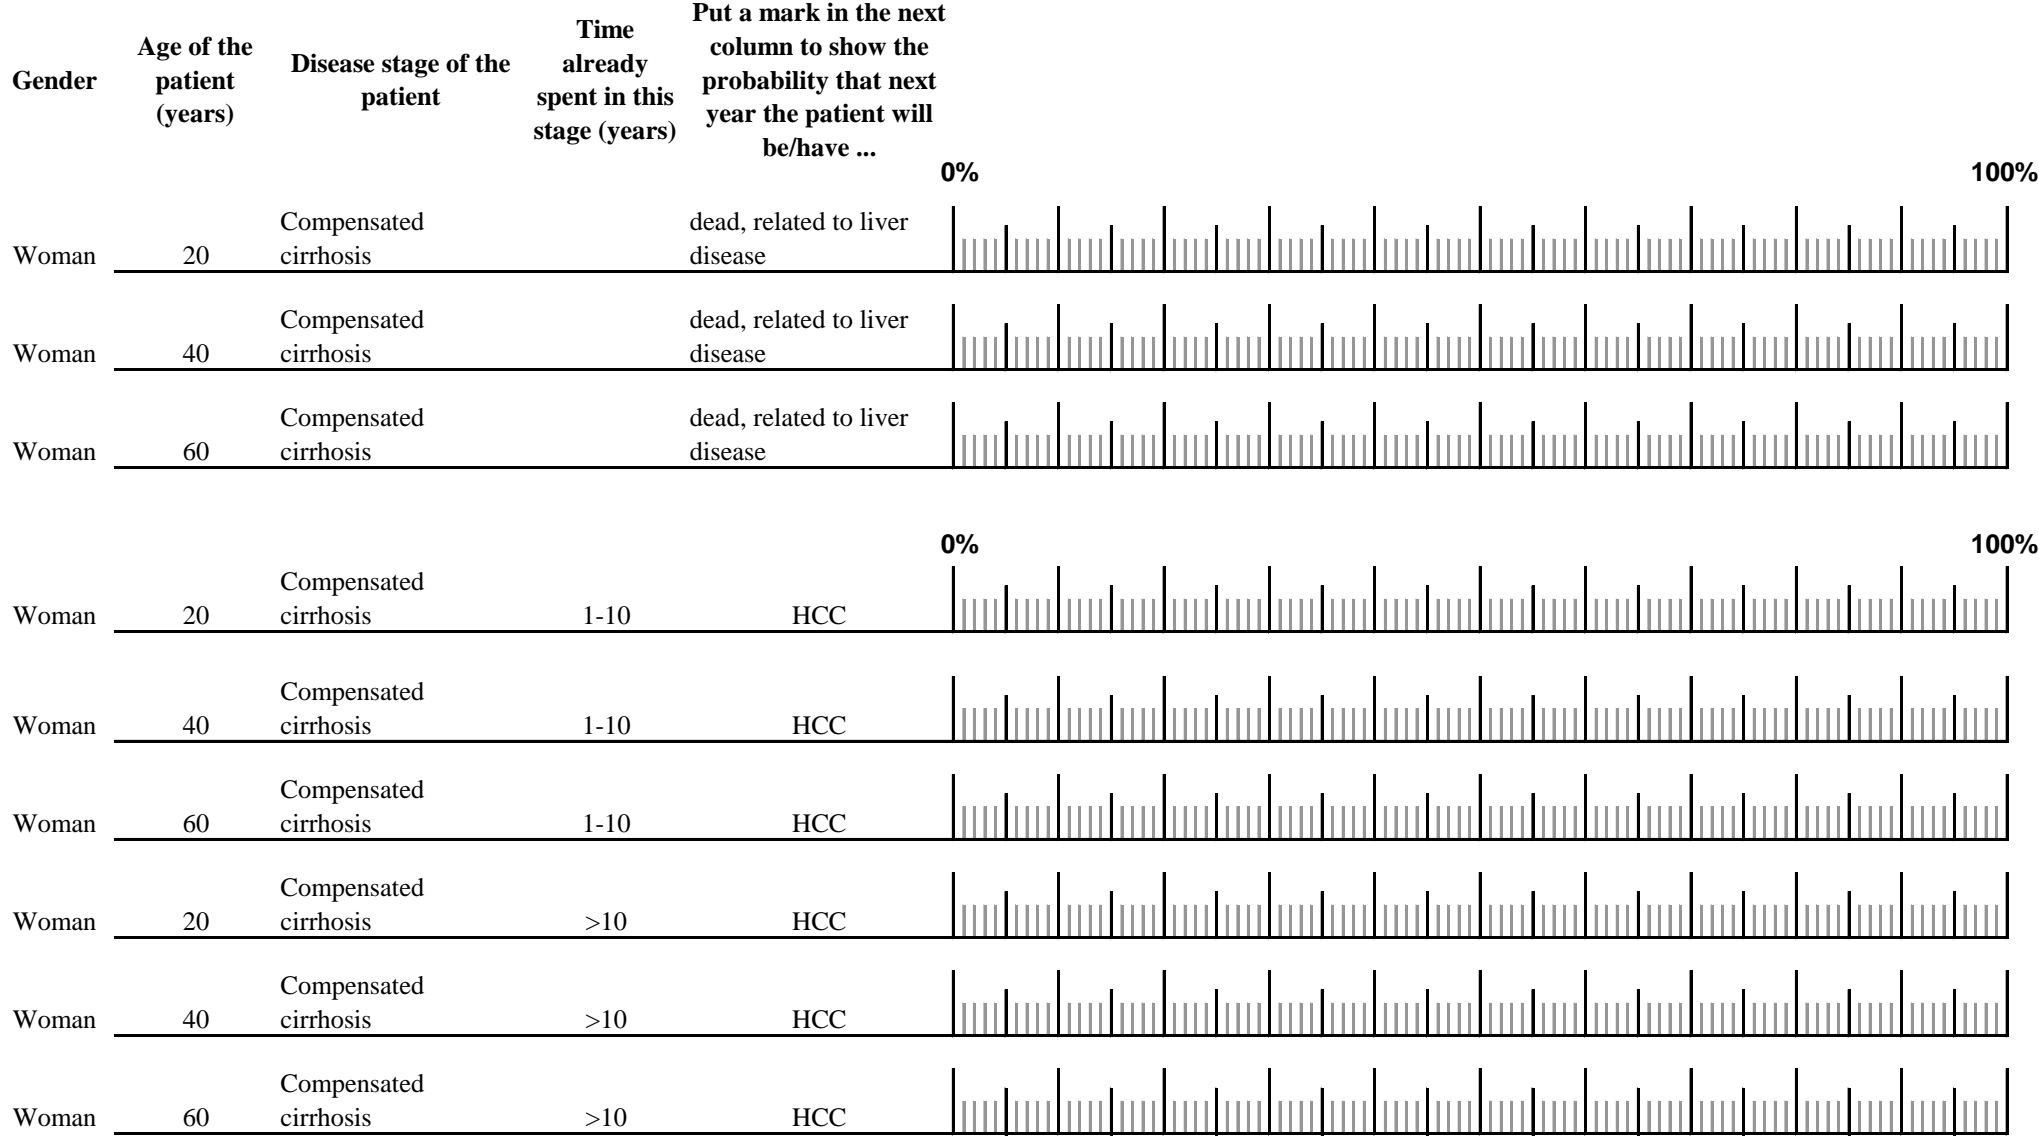

FIRST DECOMPENSATION\*

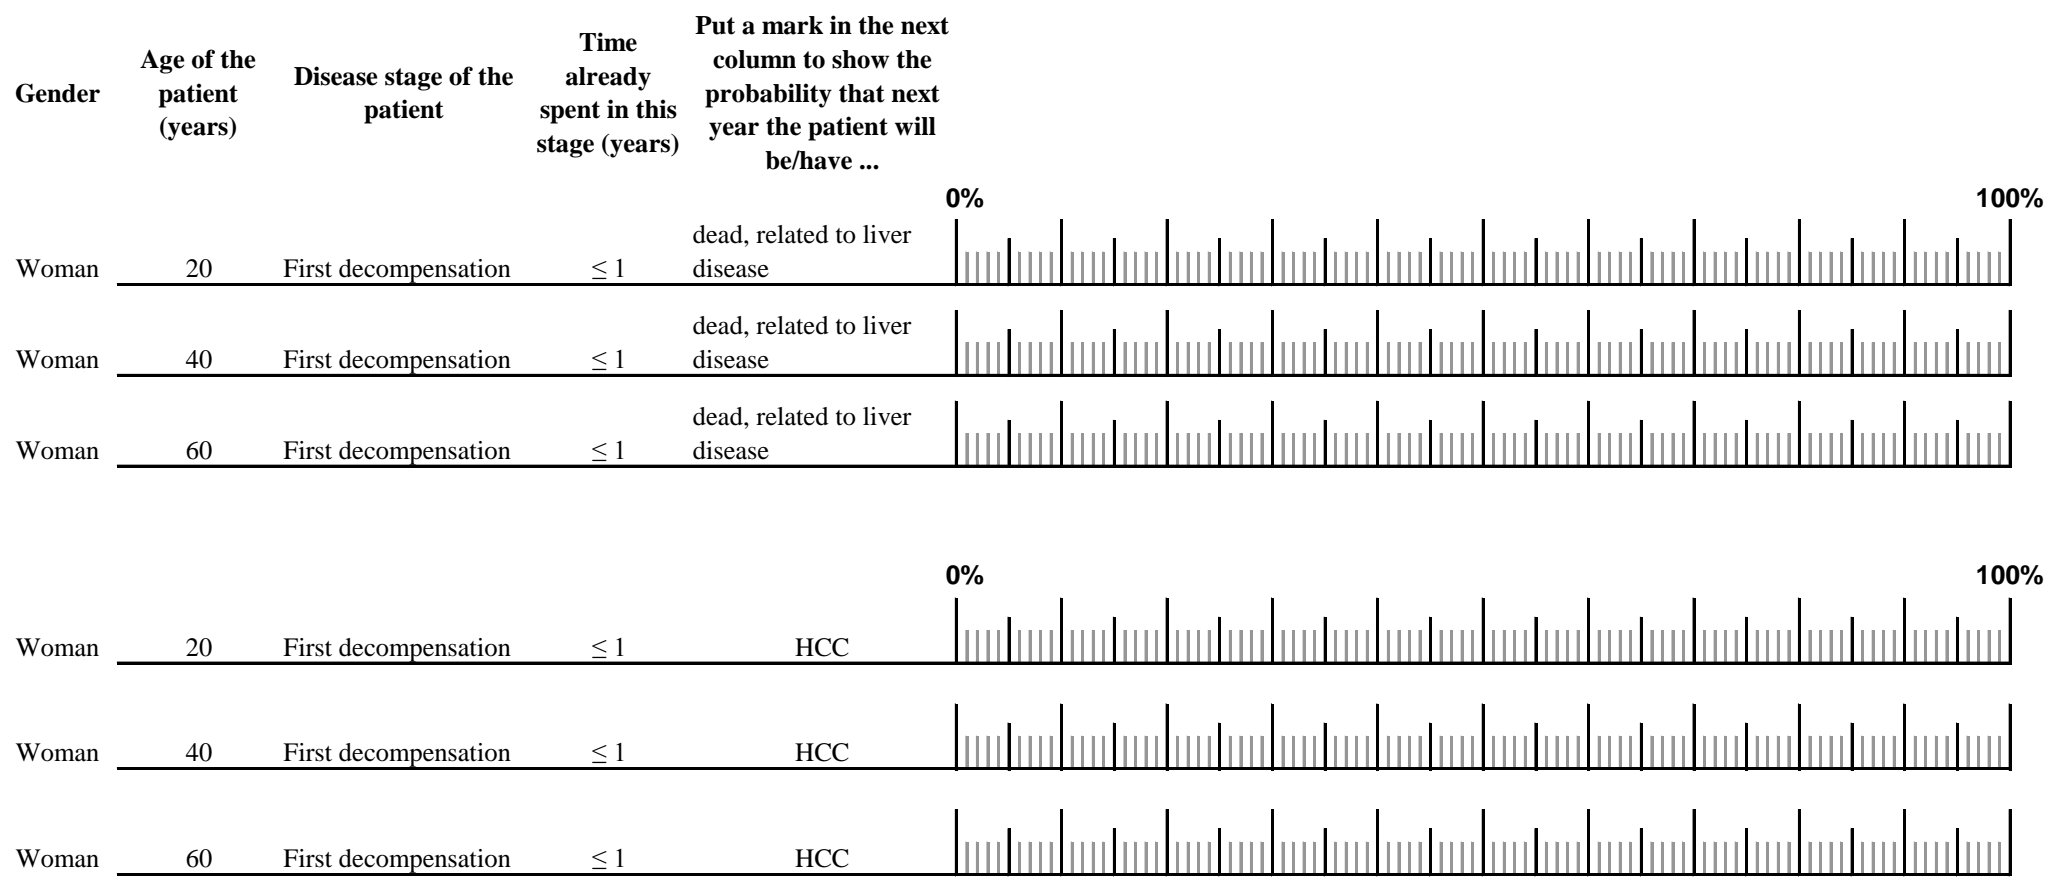

\* First decompensation: means the first decompensation episode (ascites, digestive hemorrhage, encephalopathy, icterus)

**STABLE DECOMPENSATED STATE\***

| Gender | Age of the patient (years) | Disease stage of the patient | Time already spent in this stage (years) | Put a mark in the next column to show the probability that next year the patient will be/have ... | 0% | 100% |
|--------|----------------------------|------------------------------|------------------------------------------|---------------------------------------------------------------------------------------------------|----|------|
| Woman  | 20                         | Stable decompensated state   |                                          | dead, related to liver disease                                                                    |    |      |
| Woman  | 40                         | Stable decompensated state   |                                          | dead, related to liver disease                                                                    |    |      |
| Woman  | 60                         | Stable decompensated state   |                                          | dead, related to liver disease                                                                    |    |      |
| Woman  | 20                         | Stable decompensated state   | 1-10                                     | HCC                                                                                               |    |      |
| Woman  | 40                         | Stable decompensated state   | 1-10                                     | HCC                                                                                               |    |      |
| Woman  | 60                         | Stable decompensated state   | 1-10                                     | HCC                                                                                               |    |      |
| Woman  | 40                         | Stable decompensated state   | >10                                      | HCC                                                                                               |    |      |
| Woman  | 60                         | Stable decompensated state   | >10                                      | HCC                                                                                               |    |      |

\* Stable decompensated state: means the patient has a history of first decompensation, but afterwards no further decompensation episode

**PROGRESSIVE DECOMPENSATED STATE\***

| Gender | Age of the patient (years) | Disease stage of the patient    | Time already spent in this stage (years) | Put a mark in the next column to show the probability that next year the patient will be/have ... | 0% | 100% |
|--------|----------------------------|---------------------------------|------------------------------------------|---------------------------------------------------------------------------------------------------|----|------|
| Woman  | 20                         | Progressive decompensated state |                                          | dead, related to liver disease                                                                    |    |      |
| Woman  | 40                         | Progressive decompensated state |                                          | dead, related to liver disease                                                                    |    |      |
| Woman  | 60                         | Progressive decompensated state |                                          | dead, related to liver disease                                                                    |    |      |
| Woman  | 20                         | Progressive decompensated state |                                          | HCC                                                                                               |    |      |
| Woman  | 40                         | Progressive decompensated state |                                          | HCC                                                                                               |    |      |
| Woman  | 60                         | Progressive decompensated state |                                          | HCC                                                                                               |    |      |

\* Progressive decompensated state: means the patient has successive decompensation episodes

HCC\*

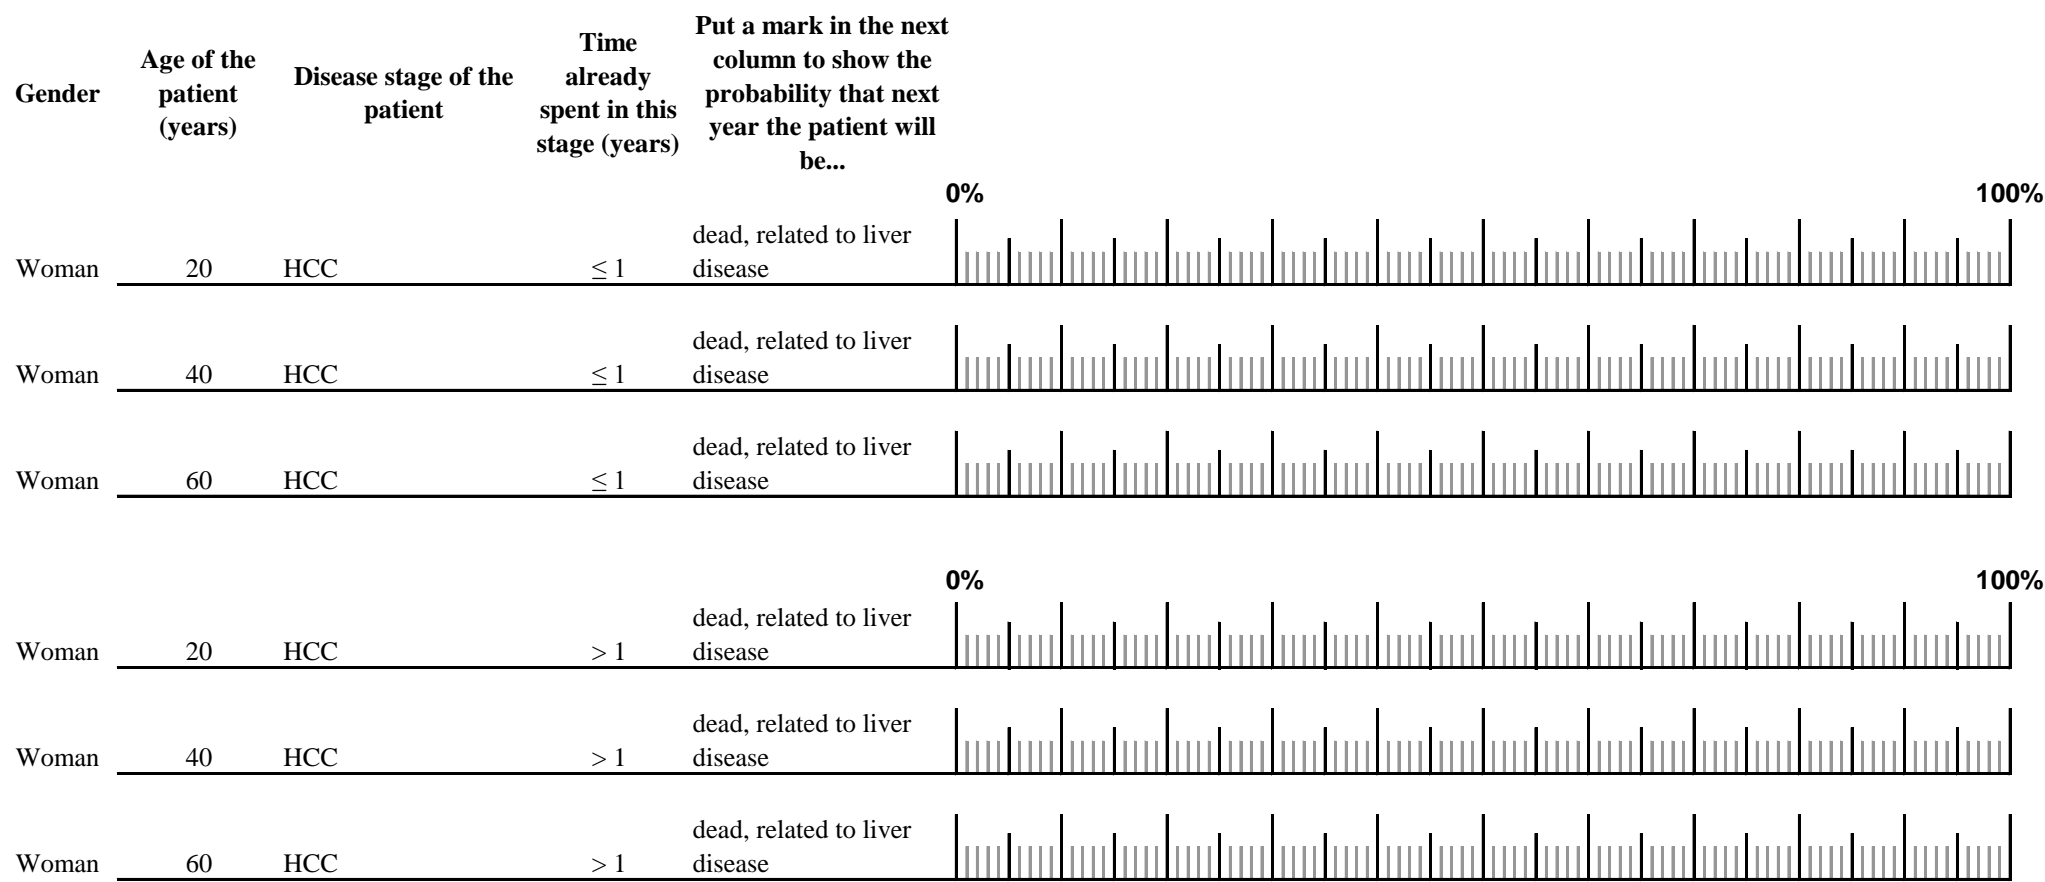

\* HCC: hepatocellular carcinoma
